# Supplementary material
Source: Springer Nature journal article supplement (https://www.springermedizin.de/resource/supplementary/12985_2010_951_MOESM1_ESM.pdf/9608810)
Supplement: MOESM1 [file 9608810]

**5' GGAAGAGAACTGCAGGTAAGGTGATGTGACAAGATTTTATGGAGCTAGAAAGCAGT**

**TCAGCCAATTTGGTGACAGTGACCTCGTTGCCAATGGGAGCAGTGCCAAGCATTAC**

**CCACAATTGGCTGAATGTGTTCCATCTGTGTCTAGCATTTTGTTTGGAAAGCTAT**

**TGGACTCAAAGGAAGATGG 3'**
